# Supplementary material
Source: Springer Nature journal article supplement (https://www.springermedizin.de/resource/supplementary/12968_2010_982_MOESM1_ESM.pdf/9580094)

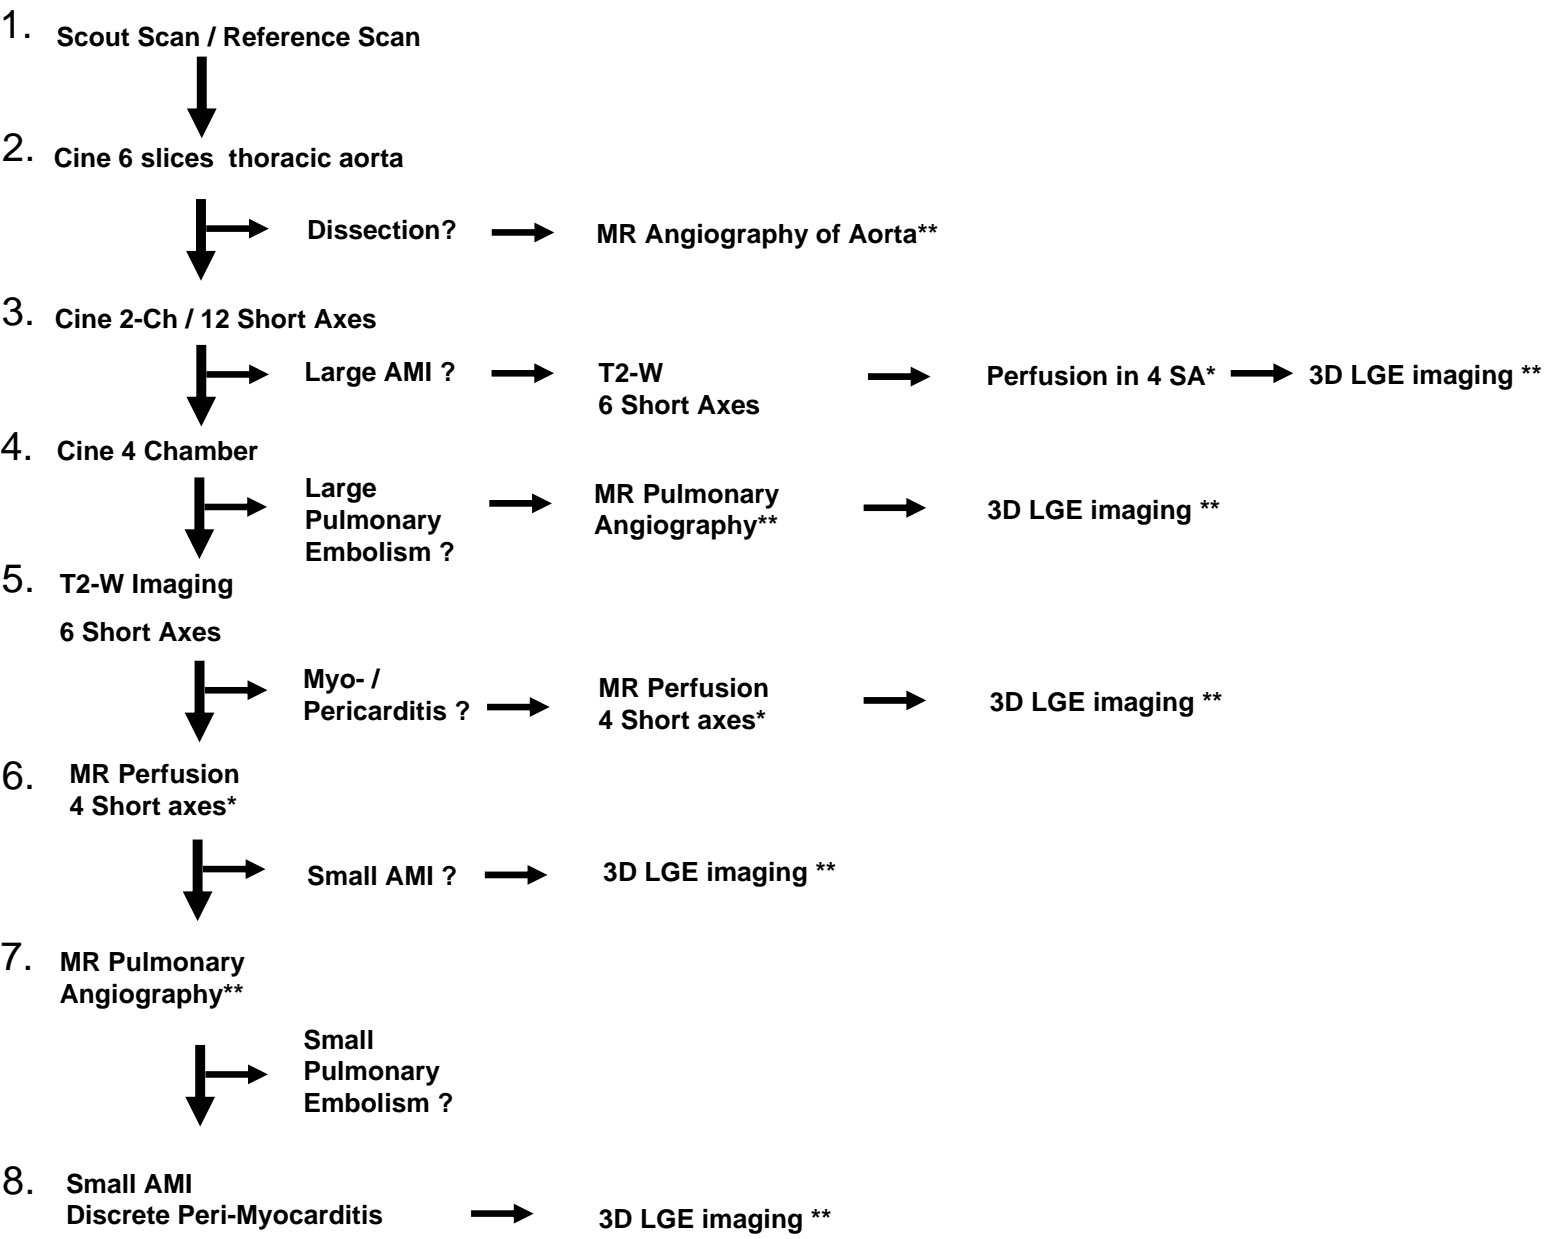

\*=Gadolinium DTPA, single dose  
 \*\*= Gadolinium DTPA, double dose

Supplement: MOESM1 [file 9580094]
